# Supplementary material for: Multi-and many-objective optimization: present and future in de novo drug design
Source: Frontiers journal article supplement (doi:10.3389/fchem.2023.1288626), 2023-12-18
Supplement: Data_Sheet_1.PDF [file Data_Sheet_1.PDF]

# Multi- and Many-Objective Optimization: Present and Future in *de novo* Drug Design – Supplementary Material –

Jaqueline S. Angelo, Isabella A. Guedes,  
Helio J. C. Barbosa and Laurent E. Dardenne

## 1 Pseudocodes of many-objective EAs

This section provides brief pseudocodes for seven many-objective EAs cited in the paper, which are: NNIA [Liu et al., 2019], Two-Arch [Praditwong and Yao, 2006], NSGA-III [Deb and Jain, 2014], MOEA/DD [Li et al., 2015], GAPF [Rocha et al., 2017], MaOEADRA [Zou et al., 2021], and IDEA [Xia et al., 2023].

---

**Algorithm 1:** Pseudocode of the NNIA Algorithm [Liu et al., 2019].

---

- 1 **Input:**  $Gmax$  (maximum number of generations);
  - 2  $nD$  (maximum size of Dominant Population);
  - 3  $nA$  (maximum size of Active Population);
  - 4  $nC$  (size of Clone Population);
  - 5 **Output:**  $D_{Gmax+1}$  (final approximate Pareto-optimal set);
  - 6 **Step1: Initialization:** Generate an initial antibody population  $B_0$  with the size  $n_D$ . Create the initial  $D_0 = \emptyset$ ,  $A_0 = \emptyset$ , and  $C_0 = \emptyset$ . Set  $t = 0$ ;
  - 7 **Step2: Update Dominant Population:** Identify dominant antibodies in  $B_t$ ; Copy all the dominant antibodies to form the temporary dominant population (denoted by  $DT_{t+1}$ ); If the size of  $DT_{t+1}$  is not greater than  $n_D$ , let  $D_{t+1} = DT_{t+1}$ . Otherwise, calculate the crowding-distance values of all individuals in  $DT_{t+1}$ , sort them in descending order of crowding-distance, choose the first  $n_D$  individuals to form  $D_{t+1}$ ;
  - 8 **Step3: Termination:** If  $t \geq Gmax$  is satisfied, export  $D_{t+1}$  as the output of the algorithm, Stop; Otherwise,  $t = t + 1$ ;
  - 9 **Step4: Nondominated Neighbor-based Selection:** If the size of  $D_t$  is not greater than  $n_A$ , let  $A_t = D_t$ . Otherwise, calculate the crowding-distance values of all individuals in  $D_t$ , sort them in descending order of crowding-distance, choose the first  $n_A$  individuals to form  $A_t$ ;
  - 10 **Step5: Proportional Cloning:** Get the clone population  $C_t$  by applying the proportional cloning to  $A_t$ ;
  - 11 **Step6: Recombination and Hypermutation:** Perform recombination and hypermutation on  $C_t$  and set  $C'_t$  to the resulting population;
  - 12 **Step7:** Get the antibody population  $B_t$  by combining the  $C'_t$  and  $D_t$ ; go to Step2;
-

---

**Algorithm 2:** Pseudocode of the Two-Arch Algorithm [Praditwong and Yao, 2006].

---

```

1 Initialize the population;
2 Initialize archives to the empty set;
3 Evaluate initial population;
4 Set  $t = 0$ ;
5 repeat
6   Collect non-dominated individuals to archives;
7   Select parents from archives;
8   Apply genetic operators to generate a new population;
9   Evaluate the new population;
10   $t = t + 1$ ;
11 until  $t == MAX\_GENERATION$ ;
```

---



---

**Algorithm 3:** Pseudocode of NSGA-III Algorithm [Deb and Jain, 2014].

---

```

1 Input:  $H$  structured reference points  $Z^s$  or supplied aspiration points  $Z^a$ , parent population  $P_t$ ;
2 Output:  $P_{t+1}$ ;
3  $S_t = \emptyset, i = 1$ ;
4  $Q_t = \text{Recombination+Mutation}(P_t)$ ;
5  $R_t = P_t \cup Q_t$ ;
6  $(F1, F2, \dots) = \text{Non-dominated-sort}(R_t)$ ;
7 repeat
8    $S_t = S_t \cup F_i$  and  $i = i + 1$ ;
9 until  $|S_t| \geq N$ ;
10 Last front to be included:  $F_l = F_i$ ;
11 if  $|S_t| = N$  then
12    $P_{t+1} = S_t$ , break
13 else
14    $P_{t+1} = \bigcup_{j=1}^{l-1} F_j$ ;
15   Points to be chosen from  $F_l : K = N - |P_{t+1}|$ ;
16   Normalize objectives and create reference set  $Z^r$ :  $\text{Normalize}(f^n, S_t, Z^r, Z^s, Z^a)$ ;
17   Associate each member  $s$  of  $S_t$  with a reference point:  $[\pi(s), d(s)] = \text{Associate}(S_t, Z^r) \% \pi(s)$ : closest reference point,  $d$ : distance between  $s$  and  $\pi(s)$ ;
18   Compute niche count of reference point  $j \in Z^r : \rho_j = \sum_{s \in S_t/F_l} ((\pi(s) = j) ? 1 : 0)$ ;
19   Choose  $K$  members one at a time from  $F_l$  to construct  $P_{t+1} : \text{Nicheing}(K, \rho_j, \pi, d, Z^r, F_l, P_{t+1})$ ;
```

---



---

**Algorithm 4:** Pseudocode of MOEA/DD Algorithm [Li et al., 2015].

---

```

1 Output: population  $P$ ;
2  $[P, W, E] \leftarrow \text{INITIALIZATION}()$ ; /*  $P$  is the parent population,  $W$  is the weight vector set and  $E$  is the neighborhood index set */
3 while termination criterion is not fulfilled do
4   for  $i \leftarrow 1$  to  $N$  do
5      $P \leftarrow \text{MATING\_SELECTION}(E(i), P)$ ;
6      $S \leftarrow \text{VARIATION}(P)$ ;
7     foreach  $x^c \in S$  do
8        $P \leftarrow \text{UPDATE\_POPULATION}(P, x^c)$ ; /*  $x^c$  is an offspring */
9 Return:  $P$ 
```

---

---

**Algorithm 5:** Pseudocode of GAPF Algorithm [Rocha et al., 2017].

---

```

1 Generate initial population;
2 Evaluate the population (using the GAPF energy potentials);
3 for  $t = 0$  to  $NEvalsMax$  do
4   Parental selection tournament;
5   Apply genetic operator on parents;
6   Evaluate offspring (using the GAPF energy potentials);
7   Parental replacement with phenotypic crowding;

```

---



---

**Algorithm 6:** Pseudocode of MaOEADRA Algorithm [Zou et al., 2021].

---

```

1 Input: Population size  $N$ , objectives  $m$ , the termination criterion;
2 Output: The final population  $P$ ;
3  $W \leftarrow \text{UniformReferencePoint}(N)$ ;
4  $P_0 \leftarrow \text{RandomInitialize}(N)$ ;
5  $A \leftarrow P_0, V \leftarrow W$ ;
6  $R \leftarrow \text{Zeros}_{N \times 1}$ ;
7  $Gen \leftarrow 1$ ;
8 while the termination criterion is not satisfied do
9    $O \leftarrow \text{Variation}(\text{MatingSelection}(P_t, N))$ ;
10   $Q_t \leftarrow P_t \cup O$ ;
11   $[A, V, R] \leftarrow \text{UpdateRefPoint}(A \cup O, W, V, R, Gen)$ ;
12   $P_{t+1} = \text{EnvironmentalSelection}(Q_t, V, A)$ ;
13   $Gen \leftarrow Gen + 1$ ;
14 Return  $P$ ;

```

---



---

**Algorithm 7:** Pseudocode of IDEA Algorithm [Xia et al., 2023].

---

```

1 Input: Population size  $N$ , objectives  $M$ , the termination criterion;
2 Output: Final population;
3 Generate uniformly distributed reference points  $RP$  and an initial population  $P_0$ ;
4 while the termination criterion is not satisfied do
5   Calculate  $I_\infty^r(p_x|p_y)$  between any two solutions and save the result to matrix  $I_M$ ;
6   Find neighbor solutions into  $S_n$  by using  $I_M$ ;
7   Crossover and mutation to generate offspring  $Q_t$  by using  $S_n$ ;
8    $P_{(t+1)} = \text{EnvironmentalSelection}(P_t \cup Q_t, I_M, RP)$ ;
9   if the problem is irregular then
10     $RP = \text{LearningPopulation}(P_{(t+1)}, N)$ ;
11     $t = t + 1$ ;
12 Return  $P_t$ 

```

---

## References

- [Deb and Jain, 2014] Deb, K. and Jain, H. (2014). An evolutionary many-objective optimization algorithm using reference-point-based nondominated sorting approach, Part I: Solving problems with box constraints. *IEEE Transactions on Evolutionary Computation*, 18(4):577–601.
- [Li et al., 2015] Li, K., Deb, K., Zhang, Q., and Kwong, S. (2015). An evolutionary many-objective optimization algorithm based on dominance and decomposition. *IEEE Transactions on Evolutionary Computation*, 19(5):694–716.
- [Liu et al., 2019] Liu, J., Wang, Y., Wang, X., Guo, S., and Sui, X. (2019). A new dominance method based on expanding dominated area for many-objective optimization. *International Journal of*

- [Praditwong and Yao, 2006] Praditwong, K. and Yao, X. (2006). A new multi-objective evolutionary optimisation algorithm: The two-archive algorithm. In *2006 International Conference on Computational Intelligence and Security*, volume 1, pages 286–291.
- [Rocha et al., 2017] Rocha, G. K., Angelo, J. S., Santos, K. B., Custódio, F. L., Dardenne, L. E., and Barbosa, H. J. (2017). Using an aggregation tree to arrange energy function terms for protein structure prediction. In *2017 IEEE Conference on Computational Intelligence in Bioinformatics and Computational Biology (CIBCB)*, pages 1–7.
- [Xia et al., 2023] Xia, Y., Huang, J., Li, X., Liu, Y., Zheng, J., and Zou, J. (2023). A many-objective evolutionary algorithm based on indicator and decomposition. *Mathematics*, 11(2):413.
- [Zou et al., 2021] Zou, J., Zhang, Z., Zheng, J., and Yang, S. (2021). A many-objective evolutionary algorithm based on dominance and decomposition with reference point adaptation. *Knowledge-Based Systems*, 231:107392.
